# Supplementary material
Source: publisher figshare collection journal article supplement (https://acs.figshare.com/ndownloader/files/13854755)

# checkCIF (basic structural check) running

Checking for embedded fcf data in CIF ...

Found embedded fcf data in CIF. Extracting fcf data from uploaded CIF, please wait ..

## checkCIF/PLATON (basic structural check)

Structure factors have been supplied for datablock(s) elaf023

THIS REPORT IS FOR GUIDANCE ONLY. IF USED AS PART OF A REVIEW PROCEDURE FOR PUBLICATION, IT SHOULD NOT REPLACE THE EXPERTISE OF AN EXPERIENCED CRYSTALLOGRAPHIC REFEREE.

No syntax errors found.

Please wait while processing ....

[CIF dictionary](#)

[Interpreting this report](#)

[Structure factor report](#)

### Datablock: elaf023

|                 |                                               |                    |
|-----------------|-----------------------------------------------|--------------------|
| Bond precision: | C-C = 0.0031 Å                                | Wavelength=0.71073 |
| Cell:           | a=16.5043(12)    b=17.7857(12)    c=7.1311(6) |                    |
|                 | alpha=90    beta=96.241(3)    gamma=90        |                    |
| Temperature:    | 100 K                                         |                    |

  

|                        | Calculated                   | Reported                     |
|------------------------|------------------------------|------------------------------|
| Volume                 | 2080.9(3)                    | 2080.9(3)                    |
| Space group            | P 21/c                       | P 21/c                       |
| Hall group             | -P 2ybc                      | -P 2ybc                      |
| Moiety formula         | C18 H20 Cl Cu N5 O S, C H4 O | C18 H20 Cl Cu N5 O S, C H4 O |
| Sum formula            | C19 H24 Cl Cu N5 O2 S        | C19 H24 Cl Cu N5 O2 S        |
| Mr                     | 485.49                       | 485.48                       |
| Dx, g cm <sup>-3</sup> | 1.550                        | 1.550                        |
| Z                      | 4                            | 4                            |
| Mu (mm <sup>-1</sup> ) | 1.305                        | 1.305                        |
| F000                   | 1004.0                       | 1004.0                       |
| F000'                  | 1006.62                      |                              |
| h,k,lmax               | 23,25,10                     | 23,25,10                     |
| Nref                   | 6171                         | 5986                         |
| Tmin,Tmax              | 0.910,0.949                  | 0.780,0.950                  |
| Tmin'                  | 0.770                        |                              |

Correction method= # Reported T Limits: Tmin=0.780  
Tmax=0.950 AbsCorr = MULTI-SCAN

Data completeness= 0.970    Theta(max)= 30.192

R(reflections)= 0.0368( 4621)    wR2(reflections)= 0.0913( 5986)

S = 1.022    Npar= 264

The following ALERTS were generated. Each ALERT has the format

**test-name ALERT alert-type alert-level.**

Click on the hyperlinks for more details of the test.

#### 🟡 Alert level C

[PLAT911\\_ALERT\\_3\\_C](#) Missing FCF Refl Between Thmin & STh/L= 0.600 9 Report

#### 🟢 Alert level G

[PLAT007\\_ALERT\\_5\\_G](#) Number of Unrefined Donor-H Atoms ..... 2 Report

[PLAT066\\_ALERT\\_1\\_G](#) Predicted and Reported Tmin&Tmax Range Identical ? Check

[PLAT232\\_ALERT\\_2\\_G](#) Hirshfeld Test Diff (M-X) Cu1 --S1 . 6.0 s.u.

[PLAT398\\_ALERT\\_2\\_G](#) Deviating C-O-C Angle From 120 for O1 108.4 Degree

|                                   |                                                  |     |      |
|-----------------------------------|--------------------------------------------------|-----|------|
| <a href="#">PLAT910_ALERT_3_G</a> | Missing # of FCF Reflection(s) Below Theta(Min). | 2   | Note |
| <a href="#">PLAT912_ALERT_4_G</a> | Missing # of FCF Reflections Above STh/L= 0.600  | 174 | Note |
| <a href="#">PLAT933_ALERT_2_G</a> | Number of OMIT Records in Embedded .res File ... | 9   | Note |
| <a href="#">PLAT978_ALERT_2_G</a> | Number C-C Bonds with Positive Residual Density. | 7   | Info |

0 **ALERT level A** = Most likely a serious problem - resolve or explain  
0 **ALERT level B** = A potentially serious problem, consider carefully  
1 **ALERT level C** = Check. Ensure it is not caused by an omission or oversight  
8 **ALERT level G** = General information/check it is not something unexpected

1 ALERT type 1 CIF construction/syntax error, inconsistent or missing data  
4 ALERT type 2 Indicator that the structure model may be wrong or deficient  
2 ALERT type 3 Indicator that the structure quality may be low  
1 ALERT type 4 Improvement, methodology, query or suggestion  
1 ALERT type 5 Informative message, check

It is advisable to attempt to resolve as many as possible of the alerts in all categories. Often the minor alerts point to easily fixed oversights, errors and omissions in your CIF or refinement strategy, so attention to these fine details can be worthwhile. In order to resolve some of the more serious problems it may be necessary to carry out additional measurements or structure refinements. However, the purpose of your study may justify the reported deviations and the more serious of these should normally be commented upon in the discussion or experimental section of a paper or in the "special\_details" fields of the CIF. checkCIF was carefully designed to identify outliers and unusual parameters, but every test has its limitations and alerts that are not important in a particular case may appear. Conversely, the absence of alerts does not guarantee there are no aspects of the results needing attention. It is up to the individual to critically assess their own results and, if necessary, seek expert advice.

### Publication of your CIF in IUCr journals

A basic structural check has been run on your CIF. These basic checks will be run on all CIFs submitted for publication in IUCr journals (*Acta Crystallographica*, *Journal of Applied Crystallography*, *Journal of Synchrotron Radiation*); however, if you intend to submit to *Acta Crystallographica Section C* or *E* or *IUCrData*, you should make sure that [full publication checks](#) are run on the final version of your CIF prior to submission.

### Publication of your CIF in other journals

Please refer to the *Notes for Authors* of the relevant journal for any special instructions relating to CIF submission.

---

PLATON version of 23/04/2018; check.def file version of 23/04/2018

## Datablock elaf023 - ellipsoid plot

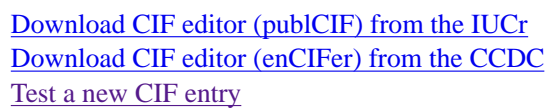

Supplement: Supplementary file 1 [file 13854755]
